# Supplementary material for: SARS–CoV-2–specific T cell responses and correlations with COVID-19 patient predisposition
Source: JCI journal article supplement (doi:10.1172/jci140965), 2020-08-24
Supplement: sd1 [file 1]

# Sattler et al., Suppl. Figure 1

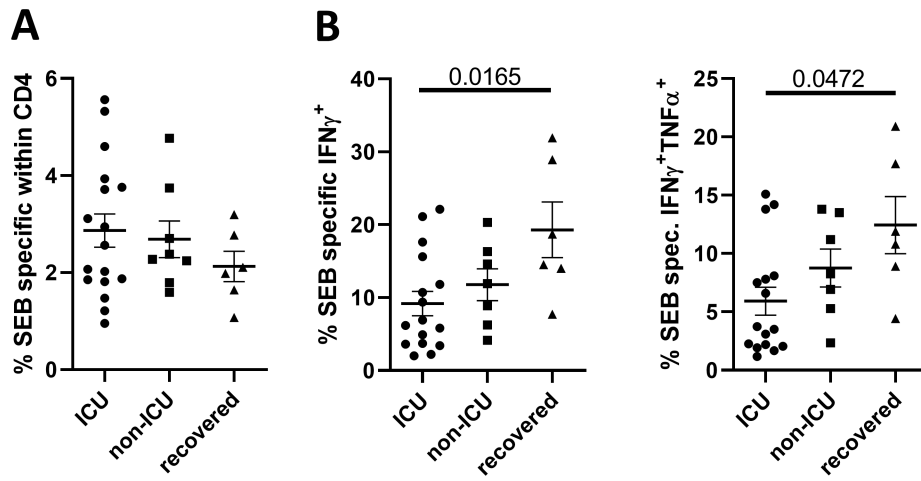

**Supplemental Figure 1** SEB-specific CD4 responses in acute COVID-19 patients and recovered individuals. (A) Frequencies of CD154<sup>+</sup>CD137<sup>+</sup> T helper cells after SEB stimulation in ICU (n=17) and non-ICU (n=8) treated patients and recovered individuals (n=6). (B) Analysis of frequencies of IFN $\gamma$ - (left, by ANOVA) or IFN $\gamma$ /TNF $\alpha$  coexpressing (right, by Kruskal-Wallis) CD4<sup>+</sup> T cells after SEB stimulation with n as in (A). Graphs show means  $\pm$  SEM.

Sattler et al., Suppl. Figure 2

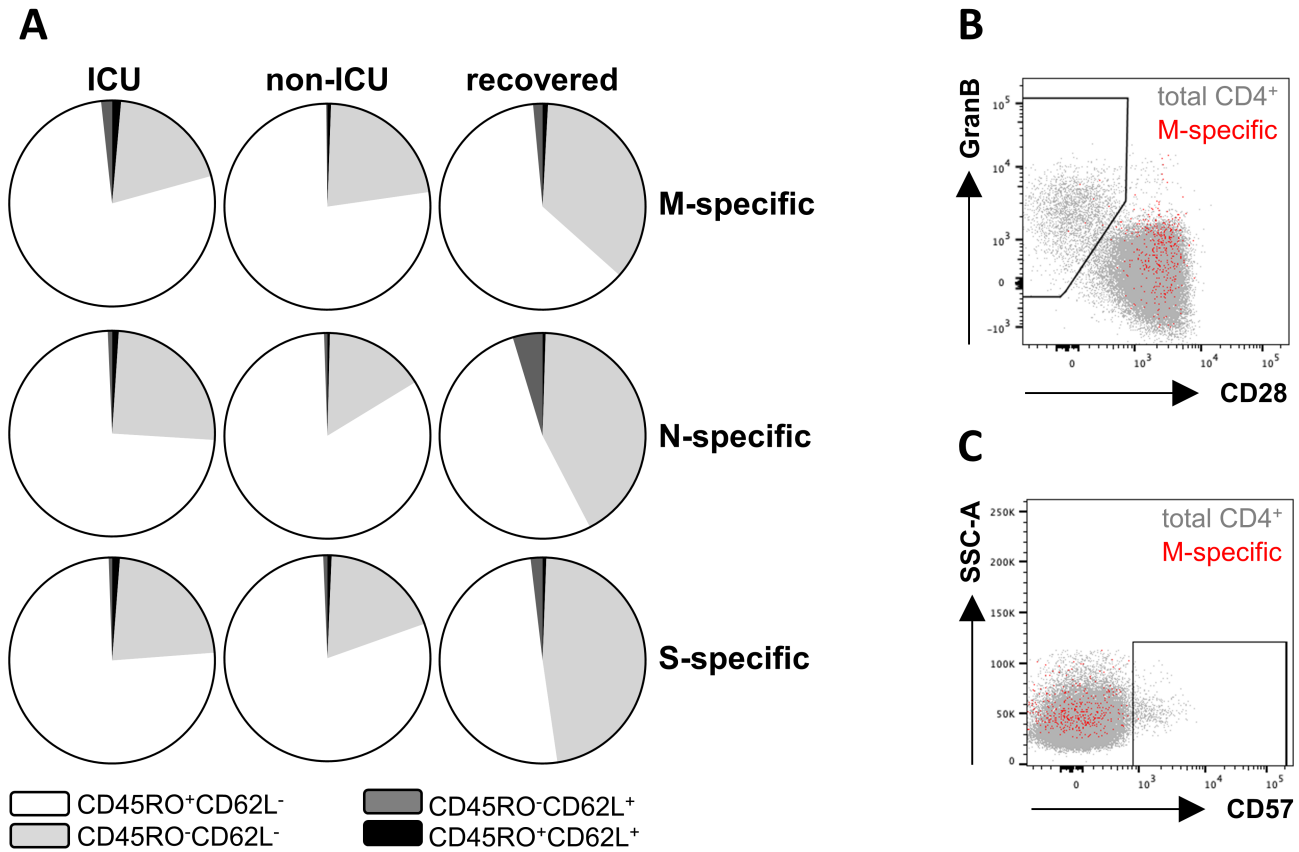

**Supplemental Figure 2** Phenotype of CoV-2 specific CD4<sup>+</sup> T cells. (A) Mean frequencies of the depicted antigen-specific T cell subsets in hospitalized ICU- and non-ICU patients as well as in recovered individuals (ICU - M: n=10, N: n=8, S: n=10; non-ICU - M: n=5, N: n=3, S: n=3; recovered - M: n=5, N: n=5, S: n=5). (B) and (C) Exemplary dot plots showing the distribution of all CD4<sup>+</sup> T cells (grey) and M-specific T cells (red) according to CD28 and Granzyme B (GranB) (B) or CD57 (C) expression. Representative for all three antigens and patients with n as in (A).

**A**

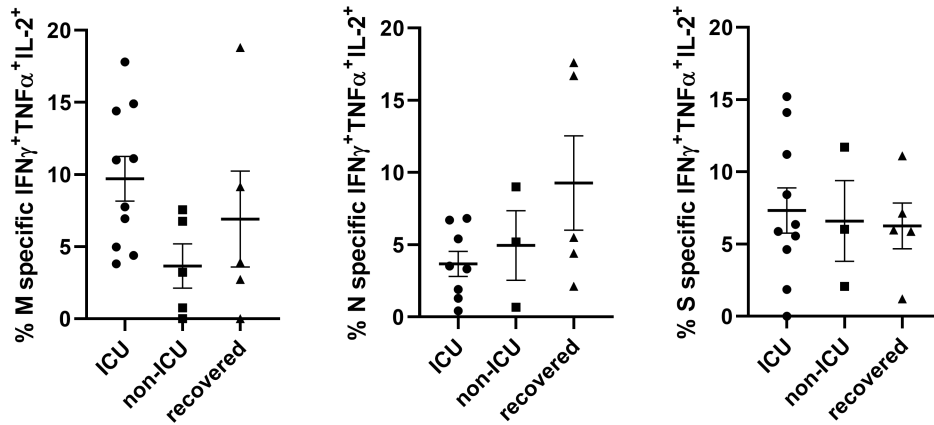

**B**

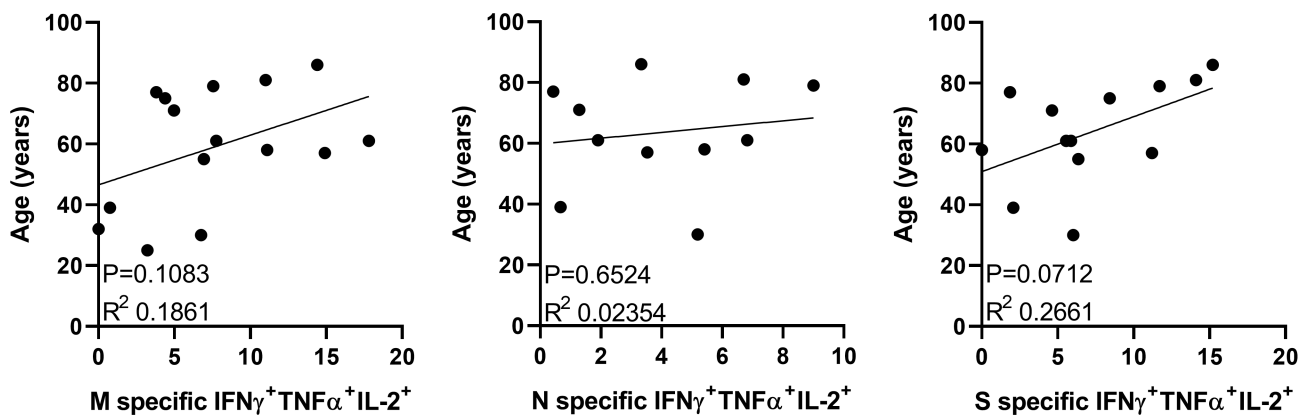

**C**

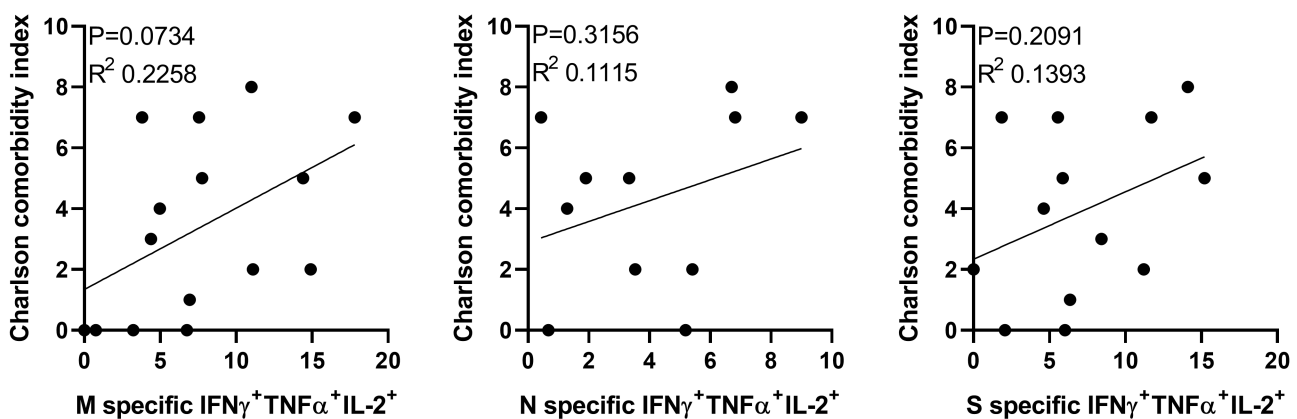

**Supplemental Figure 3 Polyfunctionality of CoV-2 specific  $CD4^+$  T cells.** (A) Frequencies of polyfunctional  $IFN\gamma^+TNF\alpha^+IL-2^+$  CoV-2 specific T cells were quantified after Boolean gating in hospitalized ICU- and non-ICU patients as well as in recovered individuals (ICU - M: n=10, N: n=8, S: n=10; non-ICU - M: n=5, N: n=3, S: n=3; recovered - M: n=5, N: n=5, S: n=5; ANOVA, respectively); frequencies in acute COVID-19 patients were further correlated (by simple linear regression analysis) with (B) age or (C) Charlson comorbidity index with patient numbers as in (A). Where applicable, graphs show means  $\pm$  SEM.
